# Supplementary material for: Dissolution kinetics of citrate coated CoFe2O4nanoparticles in soil solution
Source: Royal Society of Chemistry journal article supplement (doi:10.1039/d2en00330a), 2022-01-01
Supplement: d2en00330a3.pdf [file d2en00330a3.pdf]

Table S3. Fitting model parameters and the calculated parameters for Co released from the citrate-coated CoFe<sub>2</sub>O<sub>4</sub> NPs in soil solution at different pH levels according to different dissolution kinetic models.

| Fitting parameters                    | pH 5                      | pH 7                      | pH 8                      |
|---------------------------------------|---------------------------|---------------------------|---------------------------|
|                                       |                           | Zero-order                |                           |
| R <sup>2</sup>                        | 0.638                     | 0.358                     | 0.089                     |
| R <sup>2</sup> adjusted               | 0.625                     | 0.335                     | 0.056                     |
| Intercept                             | 0.010*                    | 0.004*                    | 0.008*                    |
| Slope                                 | 3.307x10 <sup>-5</sup> *  | 2.038x10 <sup>-5</sup> *  | -1.519x10 <sup>-5</sup>   |
| k (mM h <sup>-1</sup> )               | -3.307 x 10 <sup>-5</sup> | -2.038 x 10 <sup>-5</sup> | 1.519 x 10 <sup>-5</sup>  |
| Ms (mM)                               | 0.010                     | 0.004                     | 0.008                     |
|                                       |                           | First-order               |                           |
| R <sup>2</sup>                        | 0.570                     | 0.268                     | 0.110                     |
| R <sup>2</sup> adjusted               | 0.554                     | 0.242                     | 0.079                     |
| Intercept                             | -4.637*                   | -5.584*                   | -4.883*                   |
| Slope                                 | 0.003*                    | 0.004*                    | -0.002                    |
| k (mM h <sup>-1</sup> )               | -2.886 x 10 <sup>-3</sup> | -3.761x 10 <sup>-3</sup>  | 2.638 x 10 <sup>-3</sup>  |
| Ms (mM)                               | 0.010                     | 0.004                     | 0.008                     |
|                                       |                           | Second-order              |                           |
| R <sup>2</sup>                        | 0.491                     | 0.172                     | 0.122                     |
| R <sup>2</sup> adjusted               | 0.472                     | 0.143                     | 0.090                     |
| Intercept                             | 104.136*                  | 277.521*                  | 140.148*                  |
| Slope                                 | -0.258*                   | -0.802*                   | 0.517                     |
| k (mM <sup>-1</sup> h <sup>-1</sup> ) | -2.583 x 10 <sup>-1</sup> | -8.019 x 10 <sup>-1</sup> | 5.169 x 10 <sup>-1</sup>  |
| Ms (mM)                               | 0.010                     | 0.004                     | 0.007                     |
|                                       |                           | Pseudo-first-order        |                           |
| R <sup>2</sup>                        | 0.048                     | 0.176                     | 0.195                     |
| R <sup>2</sup> adjusted               | 0.014                     | 0.146                     | 0.167                     |
| Intercept                             | -1.168*                   | -1.145*                   | -1.128*                   |
| Slope                                 | -3.559x10 <sup>-5</sup>   | 1.827x10 <sup>-4</sup> *  | 1.115x10 <sup>-4</sup> *  |
| k (h <sup>-1</sup> )                  | 3.559 x 10 <sup>-5</sup>  | -1.827 10 <sup>-4</sup>   | -1.115x10 <sup>-4</sup>   |
| Ms (mM)                               | 0.311                     | 0.318                     | 0.324                     |
|                                       |                           | Pseudo-second-order       |                           |
| R <sup>2</sup>                        | 0.990                     | 0.805                     | 0.865                     |
| R <sup>2</sup> adjusted               | 0.989                     | 0.798                     | 0.861                     |
| Intercept                             | 225.889*                  | 1816.980*                 | -2179.680                 |
| Slope                                 | 69.793*                   | 138.250*                  | 260.020*                  |
| k (L mol <sup>-1</sup> h)             | 21.564                    | 10.519                    | -31.327                   |
| Ms (mM)                               | 0.014                     | 0.007                     | 0.004                     |
|                                       |                           | One-half-order            |                           |
| R <sup>2</sup>                        | 0.605                     | 0.316                     | 0.101                     |
| R <sup>2</sup> adjusted               | 0.591                     | 0.291                     | 0.069                     |
| Intercept                             | 0.099*                    | 0.061*                    | 0.088*                    |
| Slope                                 | 1.540x10 <sup>-4</sup>    | 1.363x10 <sup>-4</sup> *  | -9.859x10 <sup>-5</sup>   |
| k (mM <sup>1/2</sup> h)               | 3.080 x 10 <sup>-4</sup>  | -2.726 x 10 <sup>-4</sup> | -1.972 x 10 <sup>-4</sup> |
| Ms (mM)                               | 0.010                     | 0.004                     | 0.008                     |
|                                       |                           | Three-half-order          |                           |
| R <sup>2</sup>                        | 0.531                     | 0.219                     | 0.118                     |
| R <sup>2</sup> adjusted               | 0.515                     | 0.191                     | 0.085                     |
| Intercept                             | 10.183*                   | 16.471*                   | 11.655*                   |
| Slope                                 | -0.014*                   | -0.027*                   | 0.018                     |
| k (mM <sup>-1/2</sup> h)              | -2.721 x 10 <sup>-2</sup> | -5.380 x 10 <sup>-2</sup> | 3.639 x 10 <sup>-2</sup>  |
| Ms (mM)                               | 0.010                     | 0.004                     | 0.006                     |
|                                       |                           | Evolich                   |                           |
| R <sup>2</sup>                        | 0.641                     | 0.188                     | 0.043                     |
| R <sup>2</sup> adjusted               | 0.628                     | 0.159                     | 0.009                     |
| Intercept                             | 0.009*                    | 0.004*                    | 0.007*                    |
| Slope                                 | 7.878x10 <sup>-4</sup> *  | 3.507x10 <sup>-4</sup> *  | 2.524x10 <sup>-4</sup>    |
| α (mM h <sup>-1</sup> )               | 104.192                   | 20.891                    | 2.025x10 <sup>8</sup>     |

|                                        |                           |                          |                           |
|----------------------------------------|---------------------------|--------------------------|---------------------------|
| $\beta$ (L mmol <sup>-1</sup> )        | 1269.296                  | 2851.499                 | 3961.965                  |
|                                        |                           | Higuchi                  |                           |
| R <sup>2</sup>                         | 0.746                     | 0.255                    | 0.009                     |
| R <sup>2</sup> adjusted                | 0.737                     | 0.228                    | -0.027                    |
| Intercept                              | 0.009*                    | 0.004*                   | 0.008*                    |
| Slope                                  | 4.652x10 <sup>-4</sup> *  | 2.235x10 <sup>-4</sup> * | -6.223x10 <sup>-5</sup>   |
| k (mM h <sup>1/2</sup> )               | 4.652x10 <sup>-4</sup>    | 2.235 x 10 <sup>-4</sup> | -6.223 x 10 <sup>-5</sup> |
| Ms (mM)                                | 0.009                     | 0.004                    | 0.008                     |
|                                        |                           | Hixon-Crowell            |                           |
| R <sup>2</sup>                         | 0.048                     | 0.185                    | 0.198                     |
| R <sup>2</sup> adjusted                | 0.014                     | 0.156                    | 0.170                     |
| Intercept                              | 0.104*                    | 0.106*                   | 0.108*                    |
| Slope                                  | -3.703x10 <sup>-6</sup>   | 1.981x10 <sup>-5</sup> * | 1.216x10 <sup>-5</sup> *  |
| k (mM <sup>1/3</sup> h <sup>-1</sup> ) | -3.703 x 10 <sup>-6</sup> | 1.981 x 10 <sup>-5</sup> | -1.981 x 10 <sup>-5</sup> |
|                                        |                           | Korsmeyer-Peppas         |                           |
| n                                      | 0.070                     | 0.075                    | 0.113                     |
| R <sup>2</sup>                         | 0.664                     | 0.175                    | 0.019                     |
| R <sup>2</sup> adjusted                | 0.652                     | 0.146                    | -0.016                    |
| Intercept                              | -0.002*                   | 4.032x10 <sup>-4</sup>   | 0.018*                    |
| Slope                                  | 0.0306*                   | 0.012*                   | 3.561x10 <sup>-3</sup>    |
| k (h <sup>-n</sup> )                   | 0.0306                    | 0.012                    | 0.004                     |
|                                        |                           | Baker-Lonsdale           |                           |
| R <sup>2</sup>                         | 0.626                     | 0.325                    | 0.093                     |
| R <sup>2</sup> adjusted                | 0.613                     | 0.300                    | 0.060                     |
| Intercept                              | 0.003*                    | 0.012*                   | 0.023*                    |
| Slope                                  | 1.001x10 <sup>-4</sup> *  | 5.738x10 <sup>-5</sup> * | -4.665x10 <sup>-5</sup>   |
| k (h)                                  | 1.001x10 <sup>-4</sup>    | 5.738x10 <sup>-5</sup>   | -4.665x10 <sup>-5</sup>   |
|                                        |                           | Weibull                  |                           |
| R <sup>2</sup>                         | 0.625                     | 0.213                    | 0.038                     |
| R <sup>2</sup> adjusted                | 0.611                     | 0.185                    | 0.003                     |
| Intercept                              | -2.034*                   | -2.439*                  | -2.192*                   |
| Slope                                  | 0.071*                    | 0.080*                   | 0.037                     |
| a                                      | 9.247 x 10 <sup>-3</sup>  | 3.639 x 10 <sup>-3</sup> | 6.427x 10 <sup>-3</sup>   |
| b                                      | 0.071                     | 0.080                    | 0.037                     |

[M]<sub>s</sub>; theoretical saturation concentration, \*Symbol indicates significance with an  $\alpha=0.05$
